# Supplementary material
Source: bioRxiv or medRxiv preprint supplement (https://medrxiv.org/highwire/filestream/80136/field_highwire_adjunct_files/0/2020.05.06.20089573-1.pdf)

**Supplementary Figure 1.** Clinical workflow of the COVID-19 patient full cycle management. A schematic chart showing the patient status (location) from the beginning to the end of the study.

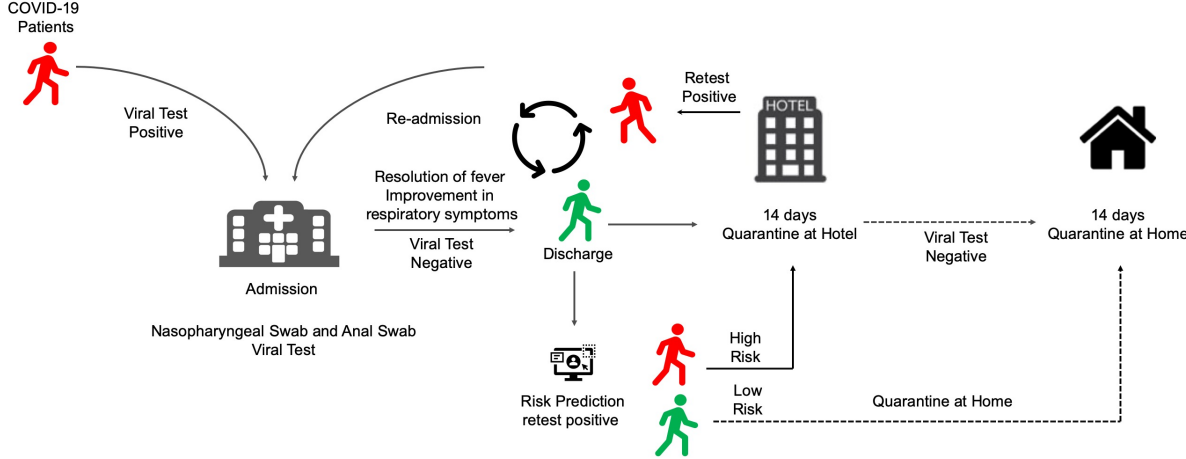

Supplement: Supplementary file [file 2020.05.06.20089573-1.pdf]
